# Supplementary material for: Prostaglandin E2 Induces Skin Aging via E-Prostanoid 1 in Normal Human Dermal Fibroblasts
Source: PubMed Central journal article supplement (PMC6887779; doi:10.3390/ijms20225555), 2019-11-07
Supplement: ijms-20-05555-s001.pdf [file ijms-20-05555-s001.pdf]

## Supplementary figure legends

### Supplementary Fig. 1

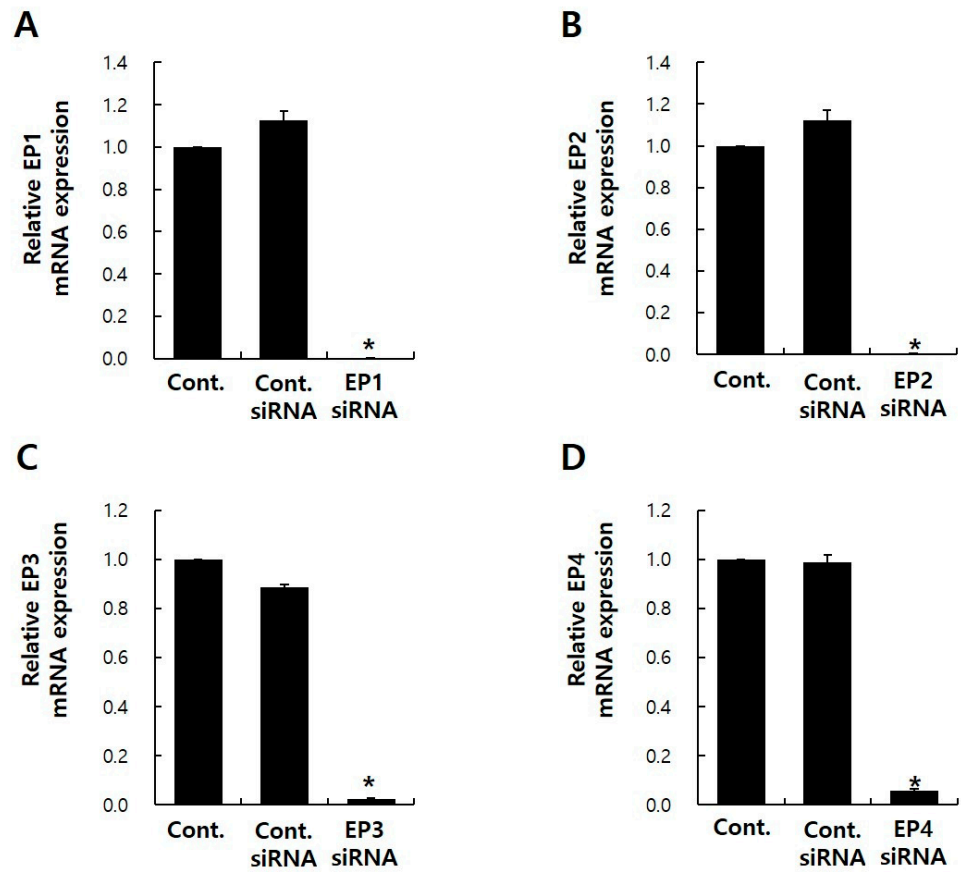

**Supplementary Fig. 1** EP1–EP4 siRNAs significantly decrease their own gene expressions. EP1–EP4 siRNA and control siRNA were transfected into NHDFs. Total RNA was extracted, and qRT-PCR was performed for EP1 (A), EP2 (B), EP3 (C), and EP4 (D). Error bars represents the SD of independent experiments.  $*P < 0.05$  compared to the control. EP, E-prostanoid; siRNA, small interfering RNA; NHDF, normal human dermal fibroblast; qRT-PCR, quantitative reverse transcription polymerase chain reaction; SD, standard deviation.

## Supplementary Fig. 2 (EP2 siRNA)

**A**

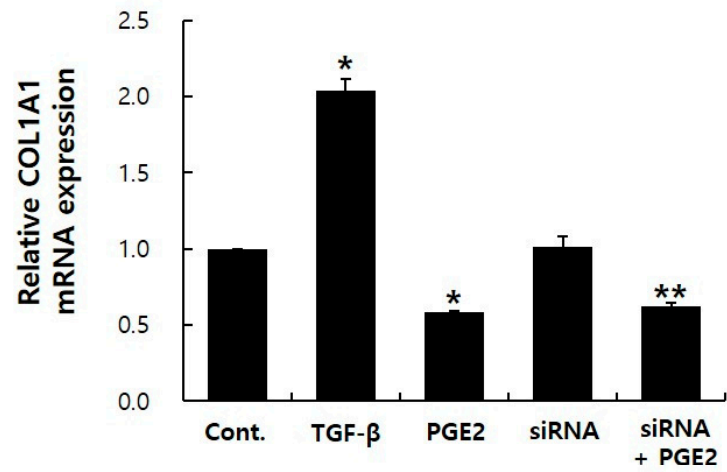

**B**

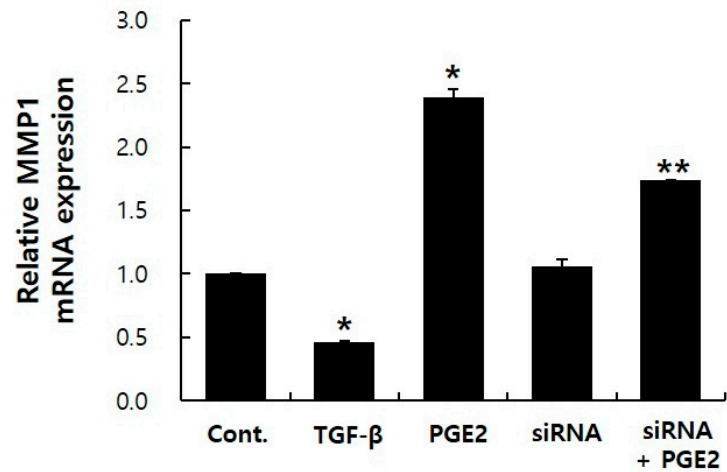

## Supplementary Fig. 2 (EP3 siRNA)

**C**

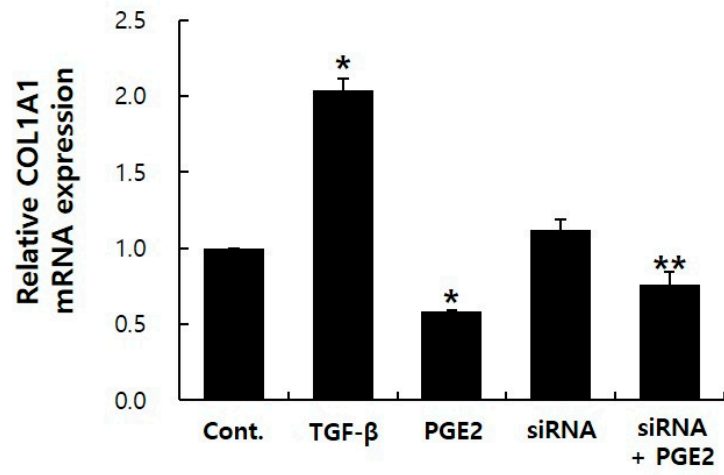

**D**

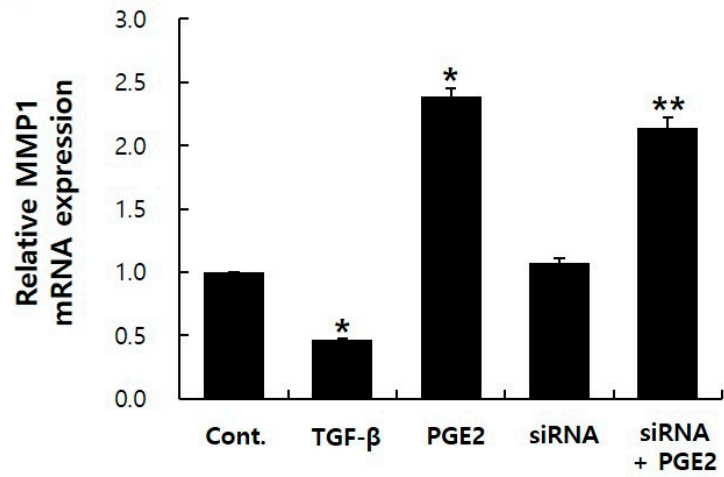

## Supplementary Fig. 2 (EP4 siRNA)

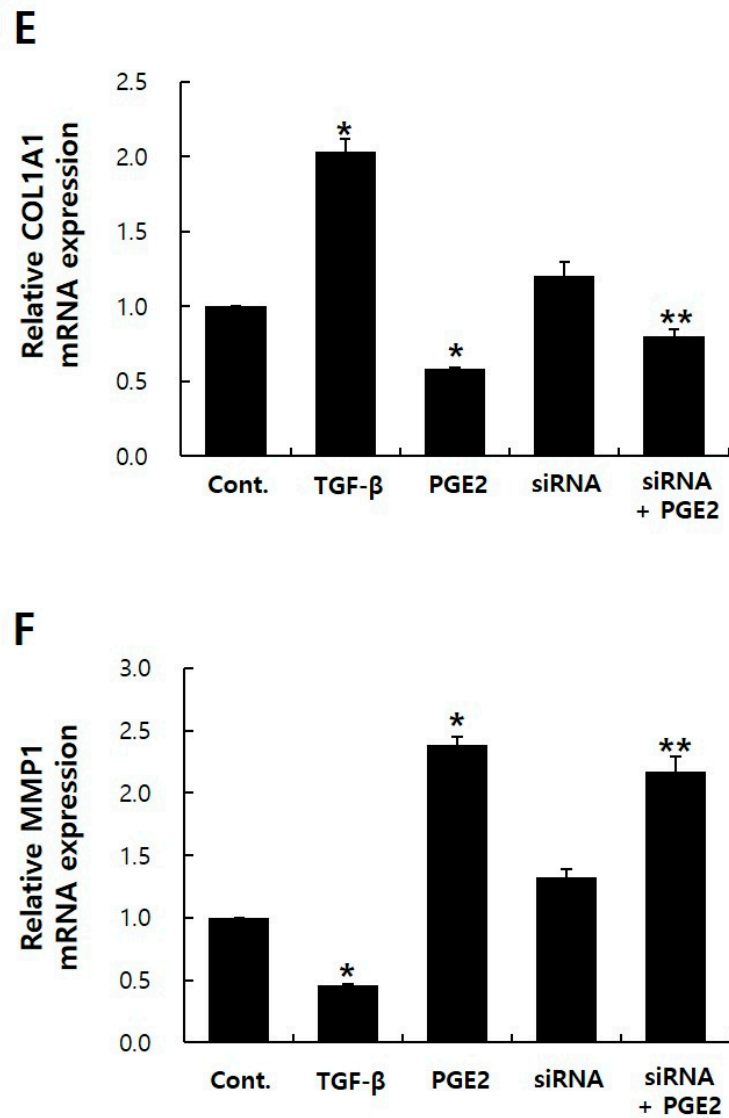

**Supplementary Fig. 2** EP2–EP4 siRNAs do not affect COL1A1 and MMP1 expression in NHDFs. EP2–EP4 siRNA and control siRNA were transfected into NHDFs. Total RNA was extracted, and qRT-PCR was performed for COL1A1 and MMP1 (A–F). Error bars represent the SD of independent experiments. \*Compared to the control; \*\* $P < 0.05$  compared to siRNA-transfected NHDFs. EP, E-prostanoid; siRNA, small interfering RNA; COL1A1, collagen, type I, alpha 1; MMP1, matrix metalloproteinase 1; NHDF, normal human dermal fibroblast; qRT-PCR, quantitative reverse transcription polymerase chain reaction; SD, standard deviation.
